# Supplementary material for: A novel Fe–La-doped hierarchical porous silica magnetic adsorbent for phosphate removal
Source: Royal Society of Chemistry journal article supplement (doi:10.1039/c6ra17279b), 2016-01-01
Supplement: c6ra17279b1.pdf [file c6ra17279b1.pdf]

## Supporting Information

The wide angle XRD patterns of MNT-1/5 and MNT-1/5 after phosphate adsorption were showed in fig. S1. The well defined crystal structure of magnetite was evidenced by the diffraction peaks. In the XRD patterns of MNT-1/5, peaks for  $44.85^\circ(110)$ ,  $38.06^\circ(10-2)$  and  $50.01^\circ(10-3)$  appeared, which are the typical XRD pattern of  $\text{La}_2\text{O}_3$  (JCPDS 40-1279). The  $\text{Fe}_3\text{O}_4$  nanoparticles exhibited well-resolved peaks at  $35.4^\circ$ ,  $57.0^\circ$ , and  $62.7^\circ$ , which are attributed to (311), (422) and (440) reflections of  $\text{Fe}_3\text{O}_4$ , respectively.<sup>1</sup>After phosphate adsorption, the major peaks represent for crystalline  $\text{LaPO}_4$  occur at  $2\theta$  values of (in decreasing order of intensity)  $29.36^\circ$ ,  $41.58^\circ$  and  $14.56^\circ$ . And peaks for  $26.267^\circ(100)$  and  $9.89^\circ(64)$  appeared, which are the XRD pattern of  $\text{Fe}(\text{H}_2\text{PO}_4)_3$  (JCPDS 43-0106).

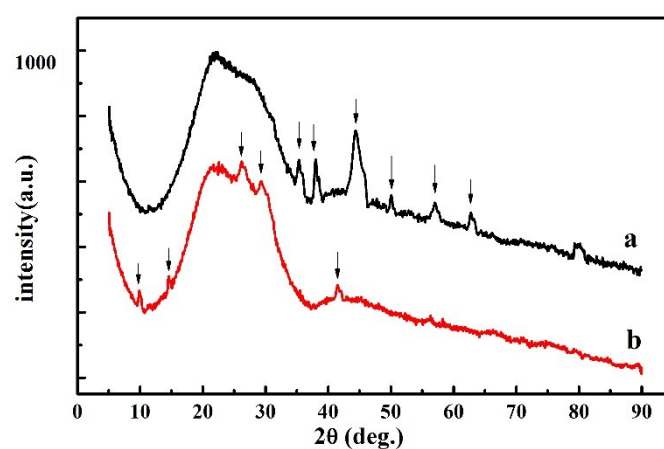

Fig.S1. The wide angle XRD patterns of MNT-1/5 (a) and MNT-1/5 after phosphate adsorption (b).

The MNT's dosage added into the adsorption isothermal experiment was  $2 \text{ g L}^{-1}$ . Then the centrifuge tubes were placed in a thermostatic shaker bath at  $25^\circ\text{C}$  for certain time. Then the solution was filtrated by using  $0.45 \mu\text{m}$  membrane syringe filter, and the filtrate was detected by ICP-OES. While the data showed the MNT basically have no adsorptive action for phosphate, showed in following fig. S2.

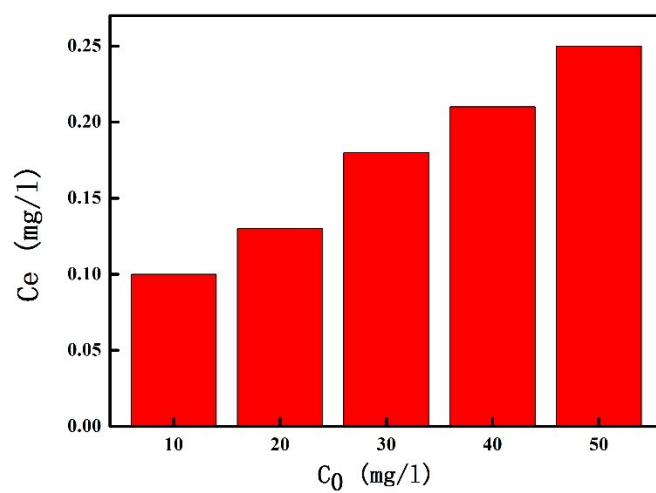

Fig. S2. The adsorb capacity of the blank MNT

1. S. Shin and J. Jang, *Chemical Communications*, 2007, DOI: 10.1039/B707706H, 4230-4232.
